# Supplementary material for: Intercalation of organic sensitisers into layered europium hydroxide and enhanced luminescence property
Source: Royal Society of Chemistry journal article supplement (doi:10.1039/c2dt30678f), 2012-01-01
Supplement: c2dt30678f.pdf [file c2dt30678f.pdf]

## Intercalation of organic sensitisers into layered europium hydroxide and enhanced luminescence property

Nankai Chu,<sup>a</sup> Yahong Sun,<sup>a</sup> Yushuang Zhao,<sup>a</sup> Xinxin Li,<sup>b</sup> Genban Sun,<sup>a</sup>  
Shulan Ma <sup>a,\*</sup> and Xiaojing Yang <sup>a,\*</sup>

<sup>a</sup> College of Chemistry, Beijing Normal University, Beijing 100875, China.

<sup>b</sup> Analysis and Test Center, Beijing Normal University, Beijing 100875, China.

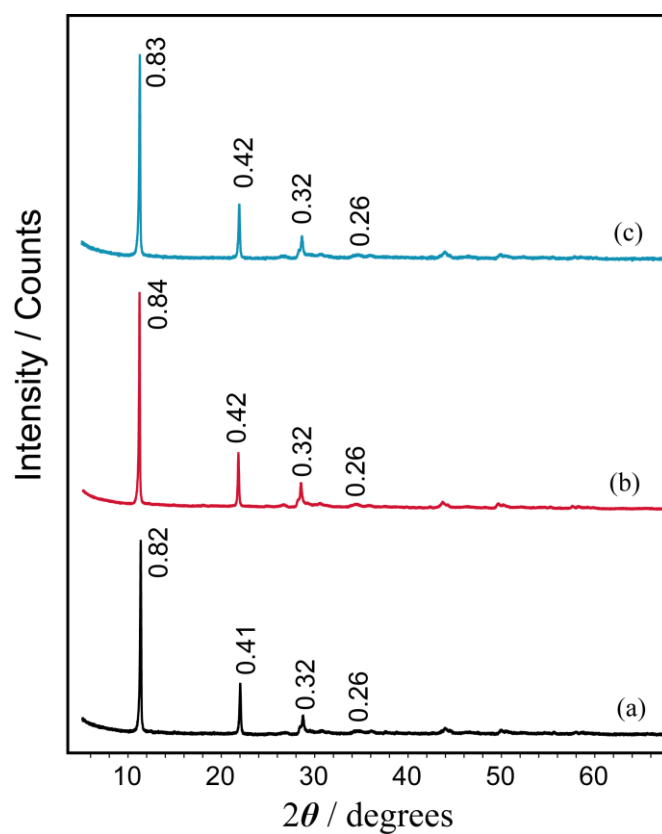

**Fig. S1** Powder XRD patterns of the NO<sub>3</sub>-LEuH precursors at different drying conditions: dried in air at ambient humidity (a), vacuum-dried at 70 °C (b), and vacuum-dried at 40 °C.

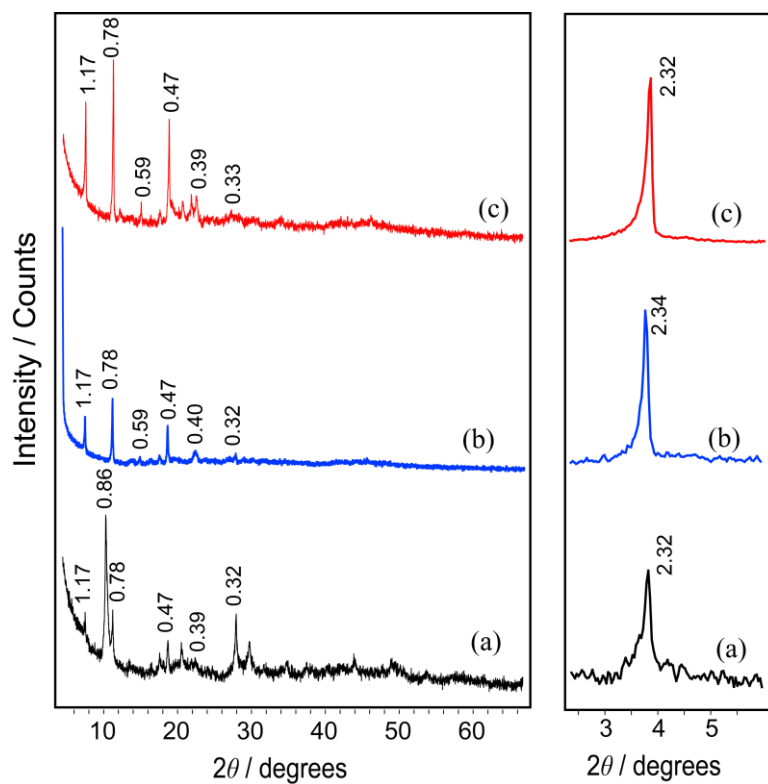

**Fig. S2** Powder XRD patterns of the composite BPC-LEuH at different drying conditions: air-dried at ambient humidity (a), vacuum-dried at 40 °C (b), and vacuum-dried at 70 °C (c).

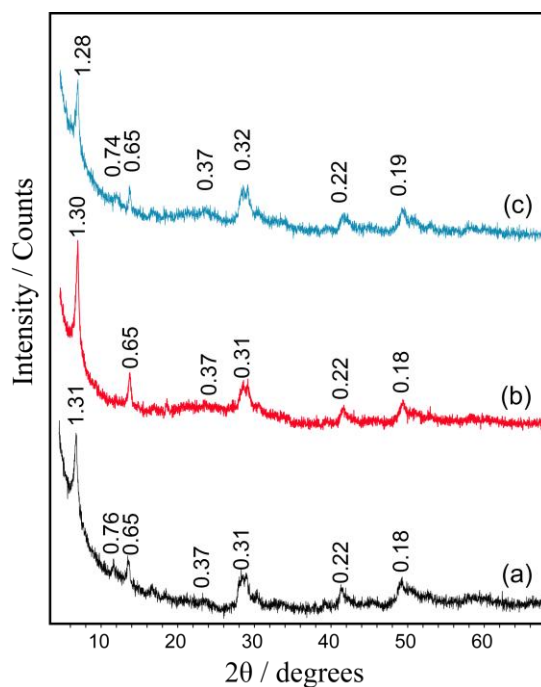

**Fig. S3** Powder XRD patterns of the composite TA-LEuH at different drying conditions: dried in air at ambient humidity (a), vacuum-dried at 40 °C (b), and vacuum-dried at 70 °C (c).

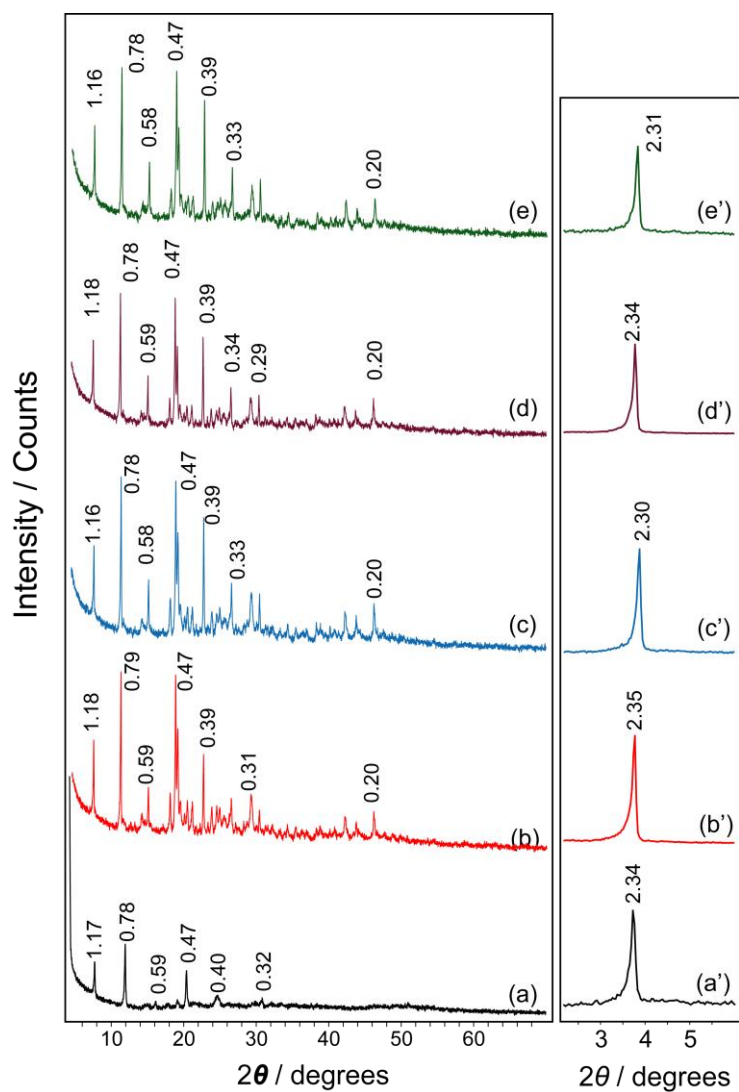

**Fig. S4** Powder XRD patterns of the composite BPC-LEuH reacted at 120 °C using different NaOH amount: the NaOH/BPC molar ratios were 1 (a), 1.2 (b), 1.5 (c), 2 (d) and 3 (e), respectively.

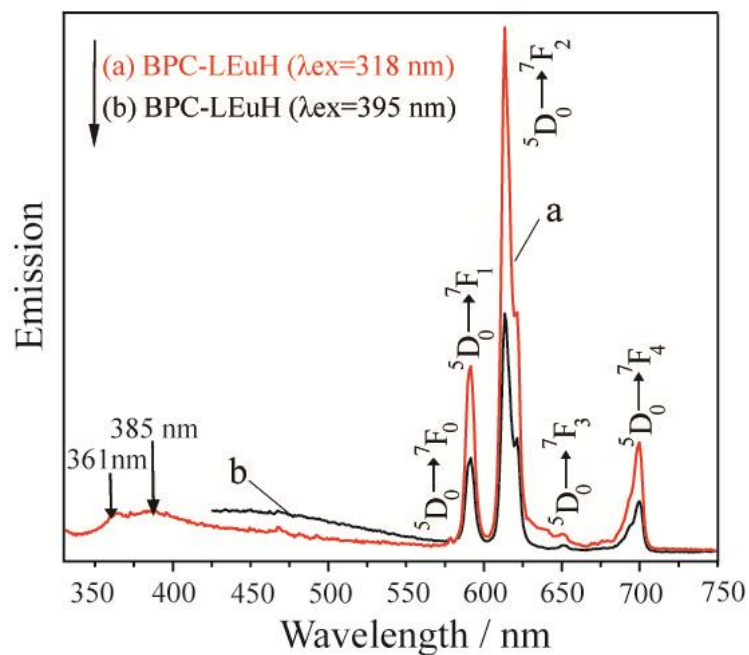

**Fig. S5** Room-temperature emission spectra of composite BPC-LEuH at excited wavelengths of 318 (a) and 395 nm (b), respectively.

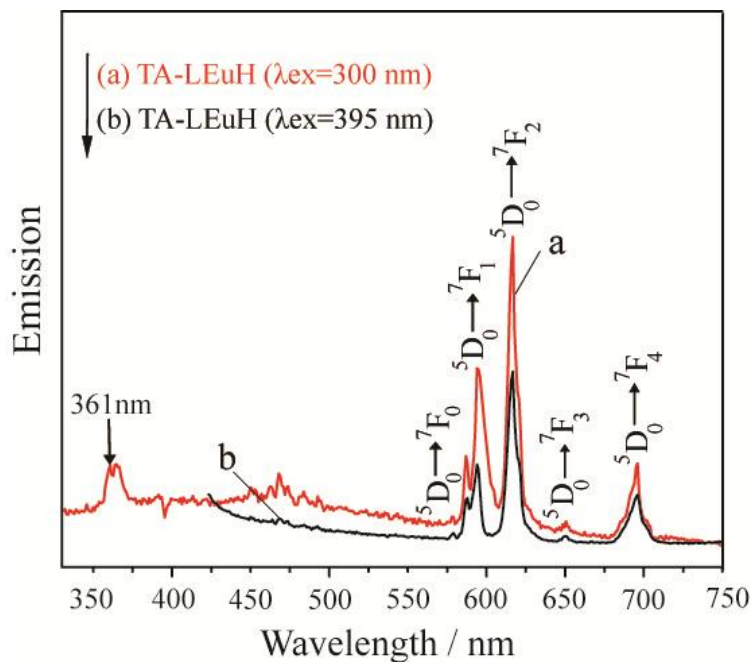

**Fig. S6** Room-temperature emission spectra of the composite TA-LEuH at different excited wavelengths: 300 nm (a), 395 nm (b).
